# Supplementary material for: A novel approach to exploring the dark genome and its application to mapping of the vertebrate virus fossil record
Source: PubMed Central journal article supplement (PMC11089739; doi:10.1186/s13059-024-03258-y), 2024-05-13
Supplement: 13059_2024_3258_MOESM3_ESM.pdf [file 13059_2024_3258_MOESM3_ESM.pdf]

a)

The screenshot shows a MySQL 8.0.21 interface with the following components:

- Database:** eve\_1\_chordates
- Query:**

```
1 SELECT family, count(*) AS 'number'  
2 FROM dig_results, virus_taxonomy  
3  
4 WHERE assigned_name = virus_taxonomy.name  
5 AND bitscore >= 60  
6 GROUP BY family;
```
- Tables:** active\_set, dig\_results, host\_taxonomy, searches\_performed, virus\_taxonomy
- Table Information:**
  - created: 05/06/2023, 1...
  - updated: 05/06/2023, 1...
  - engine: MyISAM
  - rows: 34,797
  - size: 70.0 MiB
  - encoding: latin1 (swedi...
- Results Table:**

| family             | number |
|--------------------|--------|
| Bornaviridae       | 2253   |
| Chuviridae         | 198    |
| Hepadnaviridae     | 911    |
| Circoviridae       | 1806   |
| Parvoviridae       | 674    |
| Adintoviridae      | 25559  |
| Potyviridae        | 3      |
| Filoviridae        | 260    |
| Paramyxoviridae    | 17     |
| Herpesviridae      | 13     |
| Adenoviridae       | 13     |
| Geminiviridae      | 1      |
| Caulimovirus       | 1      |
| Iflaviridae        | 1      |
| Papillomaviridae   | 7      |
| Flaviviridae       | 12     |
| Host               | 623    |
| Retroelement       | 23     |
| Caulimoviridae     | 1      |
| Retroviridae       | 108    |
| Alloherpesviridae  | 1607   |
| ssDNA-unclassified | 1      |
- Status:** No errors; 22 rows affected, first row available after 116 ms

b)

(MySQL 8.0.21) localhost/eve\_1\_chordates/digs\_results

Select Database: eve\_1\_chordates

Structure Content Relations Triggers Table Info Query Table History Users Console

Filter

TABLES

- active\_set
- digs\_results
- host\_taxonomy
- searches\_performed
- virus\_taxonomy

```

1 SELECT host_taxonomy.species, host_taxonomy.tax_class, virus_taxonomy.family, assigned_name, assigned_gene, bitscore, identity
2 FROM host_taxonomy, virus_taxonomy, digs_results
3
4 WHERE virus_taxonomy.family = 'Paramyxoviridae'
5 AND bitscore >= 60
6 AND assigned_name = virus_taxonomy.name
7 AND organism = host_taxonomy.species
8
9 ORDER BY host_taxonomy.tax_class, host_taxonomy.superorder, host_taxonomy.tax_order, host_taxonomy.family, host_taxonomy.genus

```

Query Favorites Query History Run Current

| species VARCHAR          | tax_class VARCHAR | family VARCHAR  | assigned_name VARCHAR         | assigned_gene VARCHAR     | bitscore | identity FLOAT |
|--------------------------|-------------------|-----------------|-------------------------------|---------------------------|----------|----------------|
| Nothobranchius_furzeri   | Actinopteri       | Paramyxoviridae | Tailam-virus                  | RNA-polymerase            | 260      | 39.211         |
| Nothobranchius_furzeri   | Actinopteri       | Paramyxoviridae | Tailam-virus                  | RNA-polymerase            | 256      | 39.892         |
| Nothobranchius_furzeri   | Actinopteri       | Paramyxoviridae | Avian-paramyxovirus-5         | nucleoprotein             | 76.3     | 31.25          |
| Astyanax_mexicanus       | Actinopteri       | Paramyxoviridae | Avian-paramyxovirus-5         | nucleoprotein             | 74.7     | 25.309         |
| Astyanax_mexicanus       | Actinopteri       | Paramyxoviridae | Avian-paramyxovirus-5         | nucleoprotein             | 80.1     | 24.419         |
| Astyanax_mexicanus       | Actinopteri       | Paramyxoviridae | Human-parainfluenza-virus-1   | L-protein                 | 312      | 41.162         |
| Astyanax_mexicanus       | Actinopteri       | Paramyxoviridae | Avian-paramyxovirus-5         | nucleoprotein             | 88.6     | 23.504         |
| Astyanax_mexicanus       | Actinopteri       | Paramyxoviridae | Mojiang-virus                 | nucleocapsid              | 70.1     | 25             |
| Astyanax_mexicanus       | Actinopteri       | Paramyxoviridae | Avian-paramyxovirus-5         | nucleoprotein             | 78.2     | 26.22          |
| Beryx_splendens          | Actinopteri       | Paramyxoviridae | Bovine-parainfluenza-virus-3  | large-polymerase-subun... | 122      | 29.084         |
| Rondeletia_loricata      | Actinopteri       | Paramyxoviridae | Bovine-parainfluenza-virus-3  | large-polymerase-subun... | 120      | 44.828         |
| Rondeletia_loricata      | Actinopteri       | Paramyxoviridae | Porcine-parainfluenza-virus-1 | RNA-polymerase            | 82.8     | 40.385         |
| Coryphaenoides_rupestris | Actinopteri       | Paramyxoviridae | Mojiang-virus                 | polymerase                | 138      | 44.366         |
| Scophthalmus_maximus     | Actinopteri       | Paramyxoviridae | Nipah-virus                   | polymerase                | 81.3     | 34.591         |
| Limnodynastes_dumerilii  | Amphibia          | Paramyxoviridae | Sunshine_virus                | RDRP                      | 207      | 60.989         |
| Limnodynastes_dumerilii  | Amphibia          | Paramyxoviridae | Sunshine_virus                | RDRP                      | 273      | 49.813         |
| Scyliorhinus_torazame    | Chondrichthyes    | Paramyxoviridae | Sendai-virus                  | hemagglutinin-neuramin... | 97.4     | 34.266         |

c)

(MySQL 8.0.21) localhost/erv\_0\_rt\_vertebrates

erv\_0\_rt\_vertebrates Select Database Structure

Filter

TABLES

- active\_set
- blast\_chains
- digs\_results
- host\_taxonomy
- loci
- loci\_chains
- rv\_taxonomy
- searches\_performed

```
1 SELECT host_taxonomy.host_class, rv_taxonomy.clade, COUNT(*) as 'Number'
2
3 FROM dig_results, rv_taxonomy, host_taxonomy
4
5 WHERE dig_results.assigned_name = rv_taxonomy.name
6 AND host_taxonomy.species = organism
7 AND bitscore >= 90
8
9
10 GROUP BY host_taxonomy.host_class, rv_taxonomy.clade
11
12 ORDER BY host_taxonomy.host_class, rv_taxonomy.clade
13
```

Query Favorites Query History

| host_class     | clade | Number |
|----------------|-------|--------|
| Actinistia     | III   | 97     |
| Actinopteri    | I     | 8514   |
| Actinopteri    | II    | 64     |
| Actinopteri    | III   | 2177   |
| Agnatha        | I     | 32     |
| Agnatha        | II    | 1      |
| Agnatha        | III   | 300    |
| Amphibia       | I     | 17319  |
| Amphibia       | II    | 973    |
| Amphibia       | III   | 8019   |
| Aves           | I     | 17951  |
| Aves           | II    | 20797  |
| Aves           | III   | 42014  |
| Chondrichthyes | I     | 2018   |
| Chondrichthyes | III   | 2843   |
| Mammalia       | I     | 215304 |
| Mammalia       | II    | 174549 |
| Mammalia       | III   | 143364 |
| Reptilia       | I     | 13676  |
| Reptilia       | II    | 12120  |
| Reptilia       | III   | 20197  |

**Figure S3. Examples of SQL-based querying of DIGS results.**

Panels show screenshots of a MySQL client program (Sequel Ace) connected to a screening database generated using the database-integrated genome screening (DIGS) tool. Structured query language (SQL) can be used to interrogate and manipulate screening databases. Each panel shows a distinct SQL query (upper window) and its results (lower window).

**(a)** Deriving stratified counts of non-retroviral EVE loci. The query shown here uses a custom table ('virus taxonomy',) linked via the 'assigned name' field (see **Fig. S2a**), to group hits according to virus family. A 'digs results' table field, 'bit score', is used to restrict results to higher confidence hits - it is derived from the 'reverse' BLAST-step, in which a sequence hit identified from a 'forward' BLAST (i.e. probe versus target database file) is compared to the reference sequence library (RSL). It thereby provides an index showing how similar individual hits are to sequences included in the RSL.

**(b)** Retrieving information about paramyxovirus-derived EVEs recovered via DIGS. The query shown here provides an overview of paramyxovirus EVEs, showing the vertebrate class in which they were identified, which paramyxovirus species and genes they disclose similarity to (based on comparison to RSL sequences), and fields that show the closeness of the match. It uses two custom tables: (i) 'virus taxonomy' and (ii) 'host taxonomy,' which is linked via the 'organism' field (see **Fig. S2**). A bitscore cut-off is used to filter hits, and an order statement is used to sort results by the taxonomic designations of host species.

**(c)** An SQL query used to retrieve individual counts of high confidence endogenous retrovirus (ERV) reverse transcriptase (RT). RT hits were recovered by screening a target database comprising whole genome sequence data of 874 vertebrate species. We empirically determined that a bit score of  $\geq 90$  eliminates false positive RT hits. Host and virus taxonomy tables, linked as described above for non-retroviral viruses, are used to stratify results.
