# Supplementary material for: A novel approach to exploring the dark genome and its application to mapping of the vertebrate virus fossil record
Source: PubMed Central journal article supplement (PMC11089739; doi:10.1186/s13059-024-03258-y), 2024-05-13
Supplement: 13059_2024_3258_MOESM5_ESM.pdf [file 13059_2024_3258_MOESM5_ESM.pdf]

**Table S1. Putatively exogenous viruses identified in WGS data**

| Vertebrate species <sup>a</sup>                          | Virus family/genus           | Contig Accession #                                                          |
|----------------------------------------------------------|------------------------------|-----------------------------------------------------------------------------|
| <b>dsDNA</b>                                             |                              |                                                                             |
| Bumblebee bat ( <i>Craseonycteris thonglongyai</i> )     | <i>Adenoviridae</i> *        | PVKE010106839.1,<br>PVKE010087958.1                                         |
| Gracile opossum ( <i>Gracilinanus agilis</i> )           | <i>Adenoviridae</i> *        | JADWME010000011.1                                                           |
| Viscacha rat ( <i>Octomys mimax</i> )                    |                              | NDGM010762229.1,<br>NDGM010239277.1,<br>NDGM010144971.1,<br>NDGM010804184.1 |
| Ord's kangaroo rat ( <i>Dipodomys ordii</i> )            | <i>Adenoviridae</i> *        | n/a                                                                         |
| Greater bamboo lemur ( <i>Prolemur simus</i> )           | <i>Papillomaviridae</i> *    | MPIZ01127437.1                                                              |
| Humpbacked dolphin ( <i>Sousa chinensis</i> )            | <i>Papillomaviridae</i> *    | QWLN01062956.1,<br>QWLN01040988.1                                           |
| Duck-billed platypus ( <i>Ornithorhynchus anatinus</i> ) | <i>Papillomaviridae</i>      | n/a                                                                         |
| Budgerigar ( <i>Melopsittacus undulatus</i> )            | <i>Herpesviridae</i>         | JH541059                                                                    |
| <b>ssDNA</b>                                             |                              |                                                                             |
| David's myotis ( <i>Myotis davidii</i> )                 | <i>Chaphamaparvovirus</i>    | KB106247.1                                                                  |
| White-faced capuchin ( <i>Cebus imitator</i> )           | <i>Chaphamaparvovirus</i>    | KV391748.1                                                                  |
| Brown mesite ( <i>Mesitornis unicolor</i> )              | <i>Chaphamaparvovirus</i>    | n/a                                                                         |
| Pit viper ( <i>Protobothrops mucrosquamatus</i> )        | <i>Chaphamaparvovirus</i>    | n/a                                                                         |
| David's myotis ( <i>Myotis davidii</i> )                 | <i>Chaphamaparvovirus</i>    | n/a                                                                         |
| Canary ( <i>Serinus canaria</i> )                        | <i>Chaphamaparvovirus</i>    | n/a                                                                         |
| Gulf pipefish                                            | <i>Ichthamaparvovirus</i>    | n/a                                                                         |
| Senegalese bichir                                        | <i>Protoparvovirus</i> -like | XM_039761881,<br>XM_039762195                                               |
| <b>ssRNA+ve</b>                                          |                              |                                                                             |
| Vicugna pacos                                            | <i>Hepacivirus</i>           | ABRR02259018                                                                |

**Legend:** <sup>a</sup> Common name (Latin binomial). \* Previously unreported sequences, possibly derived from novel virus species. n/a = not available.
